# Supplementary material for: Modeling alcohol-induced neurotoxicity using human induced pluripotent stem cell-derived three-dimensional cerebral organoids
Source: PubMed Central journal article supplement (PMC7553959; doi:10.1038/s41398-020-01029-4), 2020-10-13
Supplement: 41398_2020_1029_MOESM3_ESM.pdf [file 41398_2020_1029_MOESM3_ESM.pdf]

Supplemental table 1. Ethanol-induced dysregulated genes

| GeneSymbol        | Gene description                                                                | P-value | FDR  | Fold Change | Regulation |
|-------------------|---------------------------------------------------------------------------------|---------|------|-------------|------------|
| ZKSCAN2           | zinc finger with KRAB and SCAN domains 2                                        | 0.01    | 0.25 | 2.22        | up         |
| MAFA              | MAF bZIP transcription factor A                                                 | 0.04    | 0.29 | 2.20        | up         |
| ADAM21            | ADAM metallopeptidase domain 21                                                 | 0.01    | 0.25 | 2.02        | up         |
| TBX1              | T-box 1                                                                         | 0.03    | 0.28 | 2.41        | up         |
| SASS6             | SAS-6 centriolar assembly protein                                               | 0.01    | 0.25 | 2.01        | up         |
| DDN               | dendrin                                                                         | 0.05    | 0.31 | 2.58        | up         |
| PDGFC             | platelet derived growth factor C<br>potassium voltage-gated channel subfamily C | 0.05    | 0.31 | 2.01        | up         |
| KCNC1             | member 1                                                                        | 0.02    | 0.26 | 2.35        | up         |
| WNT7A             | Wnt family member 7A<br>leucine rich repeat containing 8 VRAC subunit           | 0.03    | 0.29 | 2.15        | up         |
| LRRC8B            | B                                                                               | 0.02    | 0.26 | 2.07        | up         |
| MARCH11           | membrane associated ring-CH-type finger 11                                      | 0.01    | 0.25 | 2.47        | up         |
| C11orf87          | chromosome 11 open reading frame 87                                             | 0.01    | 0.25 | 2.38        | up         |
| MEF2C             | myocyte enhancer factor 2C                                                      | 0.01    | 0.25 | 2.81        | up         |
| TLE1              | transducin like enhancer of split 1                                             | 0.00    | 0.25 | 2.44        | up         |
| ZNF350            | zinc finger protein 350                                                         | 0.05    | 0.31 | 2.57        | up         |
| HSD11B2           | hydroxysteroid 11-beta dehydrogenase 2                                          | 0.00    | 0.24 | 2.05        | up         |
| TMEM196           | transmembrane protein 196                                                       | 0.01    | 0.25 | 2.40        | up         |
| TUSC1             | tumor suppressor candidate 1                                                    | 0.02    | 0.26 | 3.28        | up         |
| KIRREL3           | kirre like nephrin family adhesion molecule 3                                   | 0.05    | 0.31 | 2.07        | up         |
| NFS1              | NFS1, cysteine desulfurase                                                      | 0.04    | 0.30 | 2.23        | up         |
| ANKRD33B          | ankyrin repeat domain 33B                                                       | 0.03    | 0.27 | 2.50        | up         |
| SHPRH             | SNF2 histone linker PHD RING helicase                                           | 0.01    | 0.25 | 2.33        | up         |
| RGPD1             | RANBP2-like and GRIP domain containing 1                                        | 0.01    | 0.25 | 2.15        | up         |
| ZNF770            | zinc finger protein 770                                                         | 0.02    | 0.26 | 2.00        | up         |
| SLC3A1            | solute carrier family 3 member 1                                                | 0.00    | 0.24 | 2.34        | up         |
| TRMT9B            | tRNA methyltransferase 9B (putative)                                            | 0.04    | 0.30 | 2.50        | up         |
| PROCA1            | protein interacting with cyclin A1<br>MAS1 proto-oncogene, G protein-coupled    | 0.04    | 0.29 | 2.04        | up         |
| MAS1              | receptor                                                                        | 0.01    | 0.25 | 2.23        | up         |
| AKAIN1            | A-kinase anchor inhibitor 1                                                     | 0.02    | 0.26 | 2.47        | up         |
| PER2              | period circadian regulator 2<br>gamma-aminobutyric acid type A receptor         | 0.02    | 0.26 | 2.03        | up         |
| GABRG3            | gamma3 subunit                                                                  | 0.05    | 0.31 | 2.72        | up         |
| CATG00000074973.1 | calcium binding tyrosine phosphorylation<br>regulated                           | 0.04    | 0.30 | 2.02        | up         |
| CABYR             | regulated                                                                       | 0.05    | 0.31 | 2.01        | up         |
| CATG00000096491.1 |                                                                                 | 0.03    | 0.28 | 2.02        | up         |
| EFR3B             | EFR3 homolog B                                                                  | 0.00    | 0.24 | 2.08        | up         |
| SSH2              | slingshot protein phosphatase 2                                                 | 0.02    | 0.26 | 2.17        | up         |
| EP400             | E1A binding protein p400                                                        | 0.02    | 0.26 | 2.02        | up         |
| SRD5A1            | steroid 5 alpha-reductase 1                                                     | 0.01    | 0.25 | 2.42        | up         |
| ALX3              | ALX homeobox 3<br>golgi associated, gamma adaptin ear containing,               | 0.00    | 0.24 | 2.02        | up         |
| GGA3              | ARF binding protein 3                                                           | 0.04    | 0.29 | 2.29        | up         |
| ZBTB18            | zinc finger and BTB domain containing 18                                        | 0.02    | 0.26 | 2.41        | up         |
| STRN3             | striatin 3                                                                      | 0.00    | 0.25 | 2.11        | up         |
| CHD5              | chromodomain helicase DNA binding protein 5                                     | 0.04    | 0.29 | 2.57        | up         |
| CHIC1             | cysteine rich hydrophobic domain 1<br>SS18L1, nBAF chromatin remodeling complex | 0.00    | 0.24 | 2.40        | up         |
| SS18L1            | subunit<br>ribosomal modification protein rimK like family                      | 0.00    | 0.24 | 2.05        | up         |
| RIMKLA            | member A                                                                        | 0.01    | 0.25 | 2.03        | up         |
| EPHA7             | EPH receptor A7                                                                 | 0.02    | 0.26 | 2.53        | up         |
| IST1              | IST1, ESCRT-III associated factor                                               | 0.00    | 0.25 | 2.20        | up         |
| FAT4              | FAT atypical cadherin 4                                                         | 0.02    | 0.26 | 2.44        | up         |

|                   |                                                                                                              |      |      |      |    |
|-------------------|--------------------------------------------------------------------------------------------------------------|------|------|------|----|
| TBC1D2B           | TBC1 domain family member 2B                                                                                 | 0.02 | 0.26 | 2.03 | up |
| CLIP1             | CAP-Gly domain containing linker protein 1                                                                   | 0.01 | 0.25 | 2.05 | up |
| ZC3H4             | zinc finger CCCH-type containing 4                                                                           | 0.00 | 0.24 | 2.44 | up |
| SCYGR6            | small cysteine and glycine repeat containing 6                                                               | 0.01 | 0.25 | 2.03 | up |
| NAB1              | NGFI-A binding protein 1<br>acyl-CoA synthetase long chain family member 4                                   | 0.01 | 0.25 | 2.11 | up |
| ACSL4             | 4                                                                                                            | 0.03 | 0.28 | 2.86 | up |
| PRR14L            | proline rich 14 like                                                                                         | 0.03 | 0.28 | 2.05 | up |
| DENND2A           | DENN domain containing 2A                                                                                    | 0.00 | 0.25 | 2.13 | up |
| PCED1B            | PC-esterase domain containing 1B                                                                             | 0.02 | 0.26 | 2.50 | up |
| MEF2A             | myocyte enhancer factor 2A                                                                                   | 0.00 | 0.25 | 2.58 | up |
| POLN              | DNA polymerase nu                                                                                            | 0.00 | 0.25 | 2.14 | up |
| SENP5             | SUMO specific peptidase 5                                                                                    | 0.00 | 0.24 | 2.08 | up |
| TMEM245           | transmembrane protein 245                                                                                    | 0.01 | 0.25 | 2.07 | up |
| RASGEF1B          | RasGEF domain family member 1B                                                                               | 0.02 | 0.26 | 2.16 | up |
| ZNF266            | zinc finger protein 266                                                                                      | 0.01 | 0.25 | 3.27 | up |
| SCML1             | Scm polycomb group protein like 1<br>gamma-aminobutyric acid type A receptor                                 | 0.01 | 0.25 | 2.16 | up |
| GABRA2            | alpha2 subunit                                                                                               | 0.02 | 0.26 | 2.12 | up |
| HOXC13            | homeobox C13                                                                                                 | 0.01 | 0.25 | 2.65 | up |
| USPL1             | ubiquitin specific peptidase like 1                                                                          | 0.01 | 0.25 | 2.46 | up |
| ZNF362            | zinc finger protein 362                                                                                      | 0.00 | 0.24 | 2.12 | up |
| SPTB              | spectrin beta, erythrocytic                                                                                  | 0.03 | 0.28 | 2.16 | up |
| DISP2             | dispatched RND transporter family member 2                                                                   | 0.02 | 0.26 | 2.29 | up |
| CATG00000060036.1 |                                                                                                              | 0.01 | 0.25 | 2.15 | up |
| DDX42             | DEAD-box helicase 42                                                                                         | 0.04 | 0.29 | 2.05 | up |
| GAN               | gigaxonin                                                                                                    | 0.00 | 0.24 | 2.22 | up |
| ALG10B            | ALG10B, alpha-1,2-glucosyltransferase                                                                        | 0.00 | 0.25 | 2.06 | up |
| PCDHB8            | protocadherin beta 8                                                                                         | 0.00 | 0.24 | 2.03 | up |
| SNRK              | SNF related kinase                                                                                           | 0.01 | 0.25 | 2.76 | up |
| SEPT12            | septin 12                                                                                                    | 0.03 | 0.28 | 2.41 | up |
| CCSER1            | coiled-coil serine rich protein 1<br>ADP ribosylation factor guanine nucleotide exchange factor 1            | 0.01 | 0.25 | 2.06 | up |
| ARFGEF1           |                                                                                                              | 0.01 | 0.25 | 2.06 | up |
| CSRNP3            | cysteine and serine rich nuclear protein 3                                                                   | 0.00 | 0.24 | 2.38 | up |
| KBTBD2            | kelch repeat and BTB domain containing 2                                                                     | 0.00 | 0.24 | 2.13 | up |
| AC003002.3        | novel transcript                                                                                             | 0.00 | 0.24 | 2.01 | up |
| CATG00000113699.1 |                                                                                                              | 0.02 | 0.26 | 2.06 | up |
| PTPDC1            | protein tyrosine phosphatase domain containing 1<br>mitogen-activated protein kinase 8 interacting protein 3 | 0.01 | 0.25 | 2.05 | up |
| MAPK8IP3          |                                                                                                              | 0.02 | 0.26 | 2.31 | up |
| ALKBH8            | alkB homolog 8, tRNA methyltransferase                                                                       | 0.03 | 0.28 | 2.26 | up |
| MBD3L1            | methyl-CpG binding domain protein 3 like 1<br>pyridoxal dependent decarboxylase domain containing 1          | 0.03 | 0.28 | 2.13 | up |
| PDXDC1            |                                                                                                              | 0.03 | 0.28 | 2.13 | up |
| PRR35             | proline rich 35                                                                                              | 0.03 | 0.28 | 2.80 | up |
| ANK3              | ankyrin 3<br>potassium voltage-gated channel subfamily B member 2                                            | 0.04 | 0.29 | 2.01 | up |
| KCNB2             |                                                                                                              | 0.04 | 0.29 | 2.01 | up |
| SLC16A14          | solute carrier family 16 member 14                                                                           | 0.01 | 0.25 | 2.42 | up |
| RORB              | RAR related orphan receptor B                                                                                | 0.00 | 0.24 | 2.45 | up |
| BROX              | BRO1 domain and CAAX motif containing                                                                        | 0.01 | 0.25 | 2.17 | up |
| SEMA4C            | semaphorin 4C                                                                                                | 0.01 | 0.25 | 2.34 | up |
| CNTN1             | contactin 1                                                                                                  | 0.04 | 0.29 | 2.06 | up |
| PCDHB11           | protocadherin beta 11<br>aminoadipate-semialdehyde dehydrogenase-phosphopantetheinyl transferase             | 0.00 | 0.24 | 2.02 | up |
| AASDHPPT          |                                                                                                              | 0.00 | 0.24 | 2.02 | up |
| ZNF852            | zinc finger protein 852<br>mitogen-activated protein kinase 8 interacting protein 2                          | 0.02 | 0.27 | 2.02 | up |
| MAPK8IP2          |                                                                                                              | 0.02 | 0.26 | 2.11 | up |

|                   |                                                                                           |      |      |      |    |
|-------------------|-------------------------------------------------------------------------------------------|------|------|------|----|
| HSDL1             | hydroxysteroid dehydrogenase like 1                                                       | 0.00 | 0.24 | 2.30 | up |
| SLITRK1           | SLIT and NTRK like family member 1                                                        | 0.01 | 0.25 | 3.11 | up |
| PLXNC1            | plexin C1                                                                                 | 0.01 | 0.25 | 2.15 | up |
| ATP6V0A1          | ATPase H <sup>+</sup> transporting V0 subunit a1                                          | 0.02 | 0.26 | 2.54 | up |
| SFMBT2            | Scm like with four mbt domains 2                                                          | 0.01 | 0.25 | 2.10 | up |
| DPYSL2            | dihydropyrimidinase like 2                                                                | 0.01 | 0.25 | 2.03 | up |
| TTPAL             | alpha tocopherol transfer protein like                                                    | 0.00 | 0.24 | 2.28 | up |
| PEX5L             | peroxisomal biogenesis factor 5 like                                                      | 0.05 | 0.31 | 2.36 | up |
| TBC1D32           | TBC1 domain family member 32                                                              | 0.01 | 0.25 | 2.19 | up |
| TERF2             | telomeric repeat binding factor 2                                                         | 0.02 | 0.26 | 2.27 | up |
| CHRFAM7A          | CHRNA7 (exons 5-10) and FAM7A (exons A-E) fusion                                          | 0.00 | 0.24 | 2.38 | up |
| L1CAM             | L1 cell adhesion molecule                                                                 | 0.03 | 0.28 | 2.98 | up |
| GREM2             | gremlin 2, DAN family BMP antagonist<br>potassium voltage-gated channel modifier          | 0.03 | 0.28 | 2.35 | up |
| KCNS2             | subfamily S member 2                                                                      | 0.02 | 0.26 | 2.59 | up |
| ATP7A             | ATPase copper transporting alpha                                                          | 0.01 | 0.25 | 2.69 | up |
| HDAC2             | histone deacetylase 2                                                                     | 0.01 | 0.25 | 2.74 | up |
| DGKD              | diacylglycerol kinase delta                                                               | 0.01 | 0.25 | 2.17 | up |
| CPNE5             | copine 5                                                                                  | 0.03 | 0.28 | 2.27 | up |
| ZNF316            | zinc finger protein 316                                                                   | 0.02 | 0.26 | 2.07 | up |
| AC003006.1        | novel protein                                                                             | 0.02 | 0.26 | 2.37 | up |
| CATG00000057988.1 |                                                                                           | 0.00 | 0.19 | 2.15 | up |
| GPR88             | G protein-coupled receptor 88                                                             | 0.00 | 0.24 | 2.11 | up |
| RPS6KA3           | ribosomal protein S6 kinase A3                                                            | 0.01 | 0.25 | 2.07 | up |
| SPHKAP            | SPHK1 interactor, AKAP domain containing                                                  | 0.03 | 0.28 | 3.82 | up |
| DRD1              | dopamine receptor D1                                                                      | 0.02 | 0.26 | 2.39 | up |
| FAM234B           | family with sequence similarity 234 member B                                              | 0.02 | 0.26 | 2.24 | up |
| CXorf56           | chromosome X open reading frame 56<br>MYC binding protein 2, E3 ubiquitin protein         | 0.01 | 0.25 | 2.27 | up |
| MYCBP2            | ligase<br>Ras protein specific guanine nucleotide                                         | 0.03 | 0.28 | 2.33 | up |
| RASGRF1           | releasing factor 1                                                                        | 0.04 | 0.29 | 2.00 | up |
| CCDC117           | coiled-coil domain containing 117                                                         | 0.02 | 0.27 | 2.17 | up |
| CATG00000024020.1 |                                                                                           | 0.03 | 0.28 | 2.09 | up |
| COL25A1           | collagen type XXV alpha 1 chain                                                           | 0.01 | 0.25 | 2.32 | up |
| VSNL1             | visinin like 1                                                                            | 0.05 | 0.30 | 3.83 | up |
| HELQ              | helicase, POLQ like                                                                       | 0.02 | 0.26 | 2.10 | up |
| DOCK4             | dedicator of cytokinesis 4                                                                | 0.03 | 0.29 | 2.03 | up |
| ZXDA              | zinc finger X-linked duplicated A                                                         | 0.02 | 0.27 | 2.11 | up |
| GUCY1A2           | guanylate cyclase 1 soluble subunit alpha 2                                               | 0.02 | 0.26 | 2.02 | up |
| GPD1L             | glycerol-3-phosphate dehydrogenase 1 like<br>ERCC excision repair 6, chromatin remodeling | 0.02 | 0.26 | 2.03 | up |
| ERCC6             | factor                                                                                    | 0.00 | 0.24 | 2.71 | up |
| NCOA1             | nuclear receptor coactivator 1                                                            | 0.02 | 0.27 | 2.08 | up |
| FAM149A           | family with sequence similarity 149 member A                                              | 0.01 | 0.25 | 2.85 | up |
| EN2               | engrailed homeobox 2<br>protein kinase AMP-activated catalytic subunit                    | 0.01 | 0.25 | 2.10 | up |
| PRKAA2            | alpha 2                                                                                   | 0.00 | 0.24 | 2.11 | up |
| STK10             | serine/threonine kinase 10                                                                | 0.00 | 0.24 | 2.04 | up |
| GSG1L             | GSG1 like                                                                                 | 0.05 | 0.31 | 2.65 | up |
| DOC2B             | double C2 domain beta                                                                     | 0.01 | 0.25 | 2.66 | up |
| IKZF5             | IKAROS family zinc finger 5                                                               | 0.01 | 0.25 | 2.16 | up |
| KIF5A             | kinesin family member 5A                                                                  | 0.02 | 0.26 | 2.30 | up |
| DRD5              | dopamine receptor D5                                                                      | 0.00 | 0.24 | 2.64 | up |
| C5orf47           | chromosome 5 open reading frame 47<br>calcium voltage-gated channel auxiliary subunit     | 0.04 | 0.29 | 2.45 | up |
| CACNG6            | gamma 6                                                                                   | 0.00 | 0.24 | 2.32 | up |
| B3GALT1           | beta-1,3-galactosyltransferase 1                                                          | 0.00 | 0.25 | 2.49 | up |
| CATG00000040194.1 |                                                                                           | 0.01 | 0.25 | 2.60 | up |

|                   |                                                                                     |      |      |      |      |
|-------------------|-------------------------------------------------------------------------------------|------|------|------|------|
| WASF1             | WAS protein family member 1                                                         | 0.01 | 0.25 | 2.07 | up   |
| TRAPPC11          | trafficking protein particle complex 11<br>potassium voltage-gated channel modifier | 0.01 | 0.25 | 2.11 | up   |
| KCNV1             | subfamily V member 1                                                                | 0.02 | 0.26 | 2.09 | up   |
| PRRT4             | proline rich transmembrane protein 4                                                | 0.05 | 0.31 | 2.15 | up   |
| PPFIA3            | PTPRF interacting protein alpha 3                                                   | 0.00 | 0.24 | 2.32 | up   |
| DNM1              | dynamain 1                                                                          | 0.04 | 0.29 | 2.08 | up   |
| FRMD5             | FERM domain containing 5                                                            | 0.00 | 0.25 | 2.33 | up   |
| MADD              | MAP kinase activating death domain                                                  | 0.01 | 0.25 | 3.04 | up   |
| APCS              | amyloid P component, serum                                                          | 0.00 | 0.24 | 3.90 | down |
| LGALS12           | galectin 12                                                                         | 0.03 | 0.28 | 2.24 | down |
| UBD               | ubiquitin D                                                                         | 0.02 | 0.25 | 2.11 | down |
| FAIM              | Fas apoptotic inhibitory molecule                                                   | 0.03 | 0.28 | 2.37 | down |
| SOX14             | SRY-box 14                                                                          | 0.05 | 0.31 | 2.51 | down |
| KRTAP9-7          | keratin associated protein 9-7                                                      | 0.01 | 0.25 | 2.30 | down |
| C5orf63           | chromosome 5 open reading frame 63                                                  | 0.00 | 0.25 | 3.49 | down |
| CATG00000096311.1 |                                                                                     | 0.01 | 0.25 | 2.66 | down |
| GRAP2             | GRB2 related adaptor protein 2                                                      | 0.00 | 0.25 | 3.72 | down |
| CBWD1             | COBW domain containing 1                                                            | 0.01 | 0.25 | 2.21 | down |
| CATG00000049898.1 |                                                                                     | 0.02 | 0.26 | 2.56 | down |
| FCGR1B            | Fc fragment of IgG receptor 1b                                                      | 0.03 | 0.28 | 2.07 | down |
| C11orf94          | chromosome 11 open reading frame 94                                                 | 0.04 | 0.29 | 2.24 | down |
| PAGE4             | PAGE family member 4                                                                | 0.04 | 0.29 | 2.24 | down |
| CLEC19A           | C-type lectin domain containing 19A                                                 | 0.05 | 0.31 | 2.08 | down |
| TMEM173           | transmembrane protein 173                                                           | 0.03 | 0.27 | 2.21 | down |
| CATG00000111842.1 |                                                                                     | 0.04 | 0.29 | 2.72 | down |
| ACTBL2            | actin, beta like 2                                                                  | 0.02 | 0.26 | 2.69 | down |
| TMCO6             | transmembrane and coiled-coil domains 6                                             | 0.01 | 0.25 | 2.24 | down |
| LRRN4             | leucine rich repeat neuronal 4                                                      | 0.05 | 0.31 | 2.03 | down |
| NUPL2             | nucleoporin like 2                                                                  | 0.04 | 0.29 | 2.09 | down |
| OR2A12            | olfactory receptor family 2 subfamily A member<br>12                                | 0.05 | 0.31 | 2.17 | down |
| CDCP2             | CUB domain containing protein 2                                                     | 0.04 | 0.30 | 2.08 | down |
| GAD1              | glutamate decarboxylase 1                                                           | 0.02 | 0.26 | 2.28 | down |
| PAOX              | polyamine oxidase                                                                   | 0.04 | 0.30 | 2.35 | down |
| FANCD2            | FA complementation group D2                                                         | 0.03 | 0.29 | 2.23 | down |
| SPTBN2            | spectrin beta, non-erythrocytic 2                                                   | 0.01 | 0.25 | 2.67 | down |
| KRTAP4-11         | keratin associated protein 4-11                                                     | 0.02 | 0.26 | 2.07 | down |
| CTGF              | connective tissue growth factor<br>dual specificity tyrosine phosphorylation        | 0.02 | 0.26 | 2.11 | down |
| DYRK1A            | regulated kinase 1A                                                                 | 0.04 | 0.30 | 2.04 | down |
| CER1              | cerberus 1, DAN family BMP antagonist                                               | 0.01 | 0.25 | 2.43 | down |
| AL035078.4        | novel protein                                                                       | 0.03 | 0.29 | 2.07 | down |
| NVL               | nuclear VCP-like                                                                    | 0.04 | 0.29 | 2.09 | down |
| CATG0000001353.1  |                                                                                     | 0.01 | 0.25 | 2.21 | down |
| AC096644.1        |                                                                                     | 0.04 | 0.29 | 2.91 | down |
| OLR1              | oxidized low density lipoprotein receptor 1                                         | 0.04 | 0.30 | 2.11 | down |
| RXFP1             | relaxin family peptide receptor 1                                                   | 0.01 | 0.25 | 2.54 | down |

Note: false discovery rate (FDR)
